# Supplementary material for: Antimicrobial Resistance in Escherichia coli Isolated from Healthy Dogs and Cats in South Korea, 2020–2022
Source: MDPI journal article supplement (doi:10.3390/antibiotics13010027), 2023-12-27
Supplement: s1 [file s1]

Table S1. The MIC<sub>50</sub> and MIC<sub>90</sub> of the tested antimicrobials against *Escherichia coli* isolated from dogs (n = 637) and cats (n = 206) during 2020–2022 in South Korea

| Antimicrobials                 | Dogs (n = 637)    |                   |                   |                    | Cats (n = 206)   |                  |                  |                    |
|--------------------------------|-------------------|-------------------|-------------------|--------------------|------------------|------------------|------------------|--------------------|
|                                | 2020<br>(n = 193) | 2021<br>(n = 181) | 2022<br>(n = 263) | Total<br>(n = 637) | 2020<br>(n = 67) | 2021<br>(n = 71) | 2022<br>(n = 68) | Total<br>(n = 206) |
| Amikacin                       |                   |                   |                   |                    |                  |                  |                  |                    |
| MIC <sub>50</sub>              | 4                 | 4                 | 4                 | 4                  | 4                | 4                | 4                | 4                  |
| MIC <sub>90</sub>              | 4                 | 4                 | 4                 | 4                  | 4                | 4                | 4                | 4                  |
| % Resistance (No. of isolates) | 0 (0)             | 0.6 (1)           | 1.1 (3)           | 0.4 (4)            | 0 (0)            | 0 (0)            | 0 (0)            | 0 (0)              |
| Amoxicillin/ clavulanic acid   |                   |                   |                   |                    |                  |                  |                  |                    |
| MIC <sub>50</sub>              | 4                 | 4                 | 4                 | 8                  | 4                | 4                | 4                | 4                  |
| MIC <sub>90</sub>              | 16                | 8                 | 8                 | 16                 | 8                | 8                | 8                | 8                  |
| % Resistance (No. of isolates) | 6.7 (13)          | 4.4 (8)           | 9.5 (25)          | 8.2 (73)           | 0 (0)            | 7 (5)            | 4.4 (3)          | 5.5 (17)           |
| Ampicillin                     |                   |                   |                   |                    |                  |                  |                  |                    |
| MIC <sub>50</sub>              | 8                 | 4                 | 8                 | 8                  | 4                | 4                | 8                | 4                  |
| MIC <sub>90</sub>              | 64                | 64                | 64                | 64                 | 64               | 64               | 64               | 64                 |
| % Resistance (No. of isolates) | 43 (83)           | 35.9 (65)         | 46.4 (122)        | 44 (393)           | 25.4 (17)        | 31 (22)          | 20.6 (14)        | 28.4 (88)          |
| Cefalexin                      |                   |                   |                   |                    |                  |                  |                  |                    |
| MIC <sub>50</sub>              | 8                 | 8                 | 8                 | 8                  | 8                | 8                | 4                | 8                  |
| MIC <sub>90</sub>              | 32                | 16                | 8                 | 16                 | 32               | 16               | 16               | 16                 |
| % Resistance (No. of isolates) | 80.3 (155)        | 77.9 (141)        | 67.7 (178)        | 53.1 (474)         | 56.7 (38)        | 60.6 (43)        | 38.2 (26)        | 34.5 (107)         |
| Cefazolin                      |                   |                   |                   |                    |                  |                  |                  |                    |
| MIC <sub>50</sub>              | 2                 | 2                 | 2                 | 4                  | 2                | 2                | 2                | 2                  |
| MIC <sub>90</sub>              | 32                | 32                | 4                 | 32                 | 8                | 8                | 32               | 32                 |
| % Resistance (No. of isolates) | 18.1 (35)         | 14.4 (26)         | 26.2 (69)         | 23.1 (206)         | 11.9 (8)         | 15.5 (11)        | 13.2 (9)         | 14.5 (45)          |
| Cefovecin                      |                   |                   |                   |                    |                  |                  |                  |                    |
| MIC <sub>50</sub>              | 1                 | 1                 | 1                 | 1                  | 0.5              | 1                | 0.5              | 0.5                |
| MIC <sub>90</sub>              | 8                 | 8                 | 1                 | 8                  | 2                | 2                | 8                | 8                  |
| % Resistance (No. of isolates) | 14 (27)           | 12.2 (22)         | 20.5 (54)         | 19 (170)           | 9 (6)            | 9.9 (7)          | 10.3 (7)         | 11.3 (35)          |
| Cefpodoxime                    |                   |                   |                   |                    |                  |                  |                  |                    |
| MIC <sub>50</sub>              | 1                 | 1                 | 1                 | 1                  | 1                | 1                | 1                | 1                  |
| MIC <sub>90</sub>              | 8                 | 8                 | 1                 | 8                  | 4                | 1                | 8                | 8                  |

|                                |           |           |           |            |           |           |          |           |
|--------------------------------|-----------|-----------|-----------|------------|-----------|-----------|----------|-----------|
| % Resistance (No. of isolates) | 14.5 (28) | 12.2 (22) | 20.9 (55) | 19.3 (172) | 9 (6)     | 9.9 (7)   | 10.3 (7) | 11.3 (35) |
| Ceftazidime                    |           |           |           |            |           |           |          |           |
| MIC <sub>50</sub>              | 4         | 4         | 4         | 4          | 4         | 4         | 4        | 4         |
| MIC <sub>90</sub>              | 4         | 4         | 4         | 4          | 4         | 4         | 4        | 4         |
| % Resistance (No. of isolates) | 5.7 (11)  | 3.3 (6)   | 8 (21)    | 4.3 (38)   | 3 (2)     | 7 (5)     | 4.4 (3)  | 3.2 (10)  |
| Chloramphenicol                |           |           |           |            |           |           |          |           |
| MIC <sub>50</sub>              | 8         | 8         | 8         | 8          | 8         | 8         | 8        | 8         |
| MIC <sub>90</sub>              | 32        | 16        | 8         | 32         | 8         | 16        | 32       | 16        |
| % Resistance (No. of isolates) | 13.5 (26) | 9.9 (18)  | 15.2 (40) | 13.4 (120) | 3 (2)     | 8.5 (6)   | 11.8 (8) | 10 (31)   |
| Doxycycline                    |           |           |           |            |           |           |          |           |
| MIC <sub>50</sub>              | 2         | 2         | 2         | 2          | 1         | 2         | 1        | 8         |
| MIC <sub>90</sub>              | 16        | 16        | 2         | 16         | 16        | 16        | 4        | 16        |
| % Resistance (No. of isolates) | 18.7 (36) | 12.7 (23) | 16 (42)   | 16.1 (144) | 16.4 (11) | 14.1 (10) | 4.4 (3)  | 11.3 (35) |
| Enrofloxacin                   |           |           |           |            |           |           |          |           |
| MIC <sub>50</sub>              | 0.12      | 0.12      | 0.12      | 0.25       | 0.12      | 0.12      | 0.12     | 0.12      |
| MIC <sub>90</sub>              | 4         | 2         | 0.25      | 4          | 4         | 0.5       | 1        | 1         |
| % Resistance (No. of isolates) | 16.1 (31) | 9.9 (18)  | 20.5 (54) | 17.6 (157) | 10.4 (7)  | 0 (0)     | 8.8 (6)  | 9 (28)    |
| Gentamicin                     |           |           |           |            |           |           |          |           |
| MIC <sub>50</sub>              | 0.5       | 0.5       | 0.5       | 0.5        | 0.5       | 0.5       | 0.5      | 0.5       |
| MIC <sub>90</sub>              | 8         | 1         | 0.5       | 16         | 1         | 1         | 1        | 1         |
| % Resistance (No. of isolates) | 9.8 (19)  | 7.7 (14)  | 7.6 (20)  | 10.8 (96)  | 7.5 (5)   | 1.4 (1)   | 4.4 (3)  | 5.8 (18)  |
| Imipenem                       |           |           |           |            |           |           |          |           |
| MIC <sub>50</sub>              | 1         | 1         | 1         | 1          | 1         | 1         | 1        | 1         |
| MIC <sub>90</sub>              | 1         | 1         | 1         | 1          | 1         | 1         | 1        | 1         |
| % Resistance (No. of isolates) | 0.5 (1)   | 0 (0)     | 0 (0)     | 0.1 (1)    | 0 (0)     | 0 (0)     | 0 (0)    | 0 (0)     |
| Marbofloxacin                  |           |           |           |            |           |           |          |           |
| MIC <sub>50</sub>              | 0.12      | 0.12      | 0.12      | 0.25       | 0.12      | 0.12      | 0.12     | 0.12      |
| MIC <sub>90</sub>              | 4         | 2         | 0.25      | 4          | 4         | 0.5       | 1        | 1         |
| % Resistance (No. of isolates) | 16.1 (31) | 9.9 (18)  | 20.5 (54) | 17.6 (157) | 10.4 (7)  | 0 (0)     | 8.8 (6)  | 9 (28)    |
| Orbifloxacin                   |           |           |           |            |           |           |          |           |
| MIC <sub>50</sub>              | 1         | 1         | 1         | 1          | 1         | 1         | 1        | 1         |
| MIC <sub>90</sub>              | 8         | 8         | 1         | 8          | 8         | 1         | 4        | 2         |
| % Resistance (No. of isolates) | 16.6 (32) | 11 (20)   | 22.4 (59) | 12.4 (111) | 11.9 (8)  | 1.4 (1)   | 8.8 (6)  | 4.8 (15)  |

|                                |           |           |           |            |           |           |           |           |
|--------------------------------|-----------|-----------|-----------|------------|-----------|-----------|-----------|-----------|
| Piperacillin/ tazobactam       |           |           |           |            |           |           |           |           |
| MIC <sub>50</sub>              | 8         | 8         | 8         | 8          | 8         | 8         | 8         | 8         |
| MIC <sub>90</sub>              | 8         | 8         | 8         | 8          | 8         | 8         | 8         | 8         |
| % Resistance (No. of isolates) | 1 (2)     | 0 (0)     | 0.8 (2)   | 0.4 (4)    | 0 (0)     | 0 (0)     | 0 (0)     | 0 (0)     |
| Paradofloxacin                 |           |           |           |            |           |           |           |           |
| MIC <sub>50</sub>              | 0.25      | 0.25      | 0.25      | 0.25       | 0.25      | 0.25      | 0.25      | 0.25      |
| MIC <sub>90</sub>              | 2         | 1         | 0.25      | 2          | 2         | 0.25      | 0.25      | 0.25      |
| % Resistance (No. of isolates) | 15 (29)   | 9.9 (18)  | 20.2 (53) | 11.2 (100) | 10.4 (7)  | 0 (0)     | 8.8 (6)   | 4.2 (13)  |
| Tetracycline                   |           |           |           |            |           |           |           |           |
| MIC <sub>50</sub>              | 4         | 4         | 4         | 4          | 4         | 4         | 4         | 4         |
| MIC <sub>90</sub>              | 16        | 16        | 4         | 16         | 16        | 16        | 16        | 16        |
| % Resistance (No. of isolates) | 29.5 (57) | 24.3 (44) | 23.6 (62) | 18.3 (163) | 17.9 (12) | 18.3 (13) | 10.3 (7)  | 10.3 (32) |
| Trimethoprim/ sulfamethoxazole |           |           |           |            |           |           |           |           |
| MIC <sub>50</sub>              | 0.5       | 0.5       | 0.5       | 0.5        | 0.5       | 0.5       | 0.5       | 0.5       |
| MIC <sub>90</sub>              | 4         | 4         | 0.5       | 4          | 0.5       | 0.5       | 0.5       | 2         |
| % Resistance (No. of isolates) | 18.7 (36) | 13.3 (24) | 19 (50)   | 19.5 (174) | 7.5 (5)   | 4.2 (3)   | 7.4 (5)   | 9.7 (30)  |
| Colistin                       |           |           |           |            |           |           |           |           |
| MIC <sub>50</sub>              | 1         | 1         | 1         | 1          | 1         | 1         | 1         | 1         |
| MIC <sub>90</sub>              | 1         | 1         | 1         | 1          | 1         | 1         | 1         | 1         |
| % Resistance (No. of isolates) | 0 (0)     | 0 (0)     | 0.4 (1)   | 0.1 (1)    | 0 (0)     | 0 (0)     | 0 (0)     | 0 (0)     |
| MDR                            | 36.3 (70) | 28.7 (52) | 38 (100)  | 35.2 (314) | 17.9 (12) | 23.9 (17) | 20.6 (14) | 20.3 (63) |

MIC<sub>50</sub> and MIC<sub>90</sub> are the concentrations (µg/mL) at which 50% and 90% of the isolates were inhibited, respectively.

Table S2. Antimicrobial resistance rate in *Escherichia coli* isolated from dogs (n = 637) and cats (n = 206) during 2020–2022 in South Korea

| Antimicrobials | Resistance rate % (isolates) |                   |                   |                       |                 |                  |                  |                  |                       |                 |
|----------------|------------------------------|-------------------|-------------------|-----------------------|-----------------|------------------|------------------|------------------|-----------------------|-----------------|
|                | Dogs (n = 637)               |                   |                   |                       |                 | Cats (n = 206)   |                  |                  |                       |                 |
|                | 2020<br>(n = 193)            | 2021<br>(n = 181) | 2022<br>(n = 263) | Subtotal<br>(n = 637) | <i>p</i> -value | 2020<br>(n = 67) | 2021<br>(n = 71) | 2022<br>(n = 68) | Subtotal<br>(n = 206) | <i>p</i> -value |
| Amikacin       | 0 (0)                        | 0.6 (1)           | 1.1 (3)           | 0.6 (4)               | 0.3107          | 0 (0)            | 0 (0)            | 0 (0)            | 0 (0)                 | –               |

|                               |            |            |            |            |         |           |           |           |               |        |
|-------------------------------|------------|------------|------------|------------|---------|-----------|-----------|-----------|---------------|--------|
| Amoxicillin/clavulanic acid   | 6.7 (13)   | 4.4 (8)    | 9.5 (25)   | 7.2 (46)   | 0.1205  | 0 (0)     | 7.0 (5)   | 4.4 (3)   | 3.9 (8)       | 0.0982 |
| Ampicillin                    | 43.0 (83)  | 35.9 (65)  | 46.4 (122) | 42.4 (270) | 0.0881  | 25.4 (17) | 31.0 (22) | 20.6 (14) | 25.7 (53)     | 0.3767 |
| Cefalexin                     | 80.3 (155) | 77.9 (141) | 67.7 (178) | 74.4 (474) | 0.0041  | 56.7 (38) | 60.6 (43) | 38.2 (26) | 51.9 (107)    | 0.0194 |
| Cefazolin                     | 18.1 (35)  | 14.4 (26)  | 26.2 (69)  | 20.4 (130) | 0.0060  | 11.9 (8)  | 15.5 (11) | 13.2 (9)  | 13.6 (28)     | 0.8285 |
| Cefovecin                     | 14.0 (27)  | 12.2 (22)  | 20.5 (54)  | 16.2 (103) | 0.0382  | 9.0 (6)   | 9.9 (7)   | 10.3 (7)  | 9.7 (20)      | 0.9652 |
| Cefpodoxime                   | 14.5 (28)  | 12.2 (22)  | 20.9 (55)  | 16.5 (105) | 0.0340  | 9.0 (6)   | 9.9 (7)   | 10.3 (7)  | 9.7 (20)      | 0.9652 |
| Ceftazidime                   | 5.7 (11)   | 3.3 (6)    | 8.0 (21)   | 6.0 (38)   | 0.1226  | 3.0 (2)   | 7 (5)     | 4.4 (3)   | 4.9 (10)      | 0.5334 |
| Chloramphenicol               | 13.5 (26)  | 9.9 (18)   | 15.2 (40)  | 13.2 (84)  | 0.2714  | 3.0 (2)   | 8.5 (6)   | 11.8 (8)  | 7.8 (16)      | 0.1587 |
| Colistin                      | 0 (0)      | 0 (0)      | 0.4 (1)    | 0.2 (1)    | 0.4918  | 0 (0)     | 0 (0)     | 0 (0)     | 0 (0)         | –      |
| Doxycycline                   | 18.7 (36)  | 12.7 (23)  | 16.0 (42)  | 15.9 (101) | 0.2904  | 16.4 (11) | 14.1 (10) | 4.4 (3)   | 11.7 (24)     | 0.0692 |
| Enrofloxacin                  | 16.1 (31)  | 9.9 (18)   | 20.5 (54)  | 16.2 (103) | 0.0117  | 10.4 (7)  | 0 (0)     | 8.8 (6)   | 6.3 (13)      | 0.0238 |
| Gentamicin                    | 9.8 (19)   | 7.7 (14)   | 7.6 (20)   | 8.3 (53)   | 0.6562  | 7.5 (5)   | 1.4 (1)   | 4.4 (3)   | 4.4 (9)       | 0.2228 |
| Imipenem                      | 0.5 (1)    | 0 (0)      | 0 (0)      | 0.2 (1)    | 0.3170  | 0 (0)     | 0 (0)     | 0 (0)     | 0 (0)         | –      |
| Marbofloxacin                 | 16.1 (31)  | 9.9 (18)   | 20.5 (54)  | 16.2 (103) | 0.0117  | 10.4 (7)  | 0 (0)     | 8.8 (6)   | 6.3 (13)      | 0.0238 |
| Orbifloxacin                  | 16.6 (32)  | 11.0 (20)  | 22.4 (59)  | 17.4 (111) | 0.0073  | 11.9 (8)  | 1.4 (1)   | 8.8 (6)   | 7.3 (15)      | 0.0492 |
| Piperacillin/tazobactam       | 1.0 (2)    | 0 (0)      | 0.8 (2)    | 0.6 (4)    | 0.4215  | 0 (0)     | 0 (0)     | 0 (0)     | 0 (0)         | –      |
| Paradofloxacin                | 15 (29)    | 9.9 (18)   | 20.2 (53)  | 15.7 (100) | 0.0138  | 10.4 (7)  | 0 (0)     | 8.8 (6)   | 6.3 (13)      | 0.0238 |
| Tetracycline                  | 29.5 (57)  | 24.3 (44)  | 23.6 (62)  | 25.6 (163) | 0.3187  | 17.9 (12) | 18.3 (13) | 10.3 (7)  | 15.5 (32)     | 0.3485 |
| Trimethoprim/sulfamethoxazole | 18.7 (36)  | 13.3 (24)  | 19.0 (50)  | 17.3 (110) | 0.2408  | 7.5 (5)   | 4.2 (3)   | 7.4 (5)   | 6.3 (13)      | 0.6745 |
| MDR                           | 36.3(70)   | 28.7 (52)  | 38 (100)   | 34.9 (222) | 0.11543 | 17.9 (12) | 23.9 (17) | 20.6 (14) | 20.9 (43/209) | 0.6855 |

$p < 0.05$  was considered a significant change in the antimicrobial resistance trend. MDR, multidrug resistant.

Table S3. Antimicrobial resistance patterns of *Escherichia coli* isolated from dogs (n = 637) during 2020–2022 in South Korea

| Antimicrobials<br>(isolates) | Resistance patterns (isolates)                                                                                                                                                                                                                                                                                                                                                                                                                                         |
|------------------------------|------------------------------------------------------------------------------------------------------------------------------------------------------------------------------------------------------------------------------------------------------------------------------------------------------------------------------------------------------------------------------------------------------------------------------------------------------------------------|
| 0 (n = 95)                   | –                                                                                                                                                                                                                                                                                                                                                                                                                                                                      |
| 1 (n = 221)                  | AMP(n=11), CHL(n=1), GEN(n=2), LEX(n=203), ORB(n=1), SXT(n=1), TET(n=2)                                                                                                                                                                                                                                                                                                                                                                                                |
| 2 (n = 59)                   | AMP CFZ(n=1), AMP CHL(n=1), AMP LEX(n=34), AMP SXT(n=2), AMP TET(n=2), CHL SXT(n=1), DOX TET(n=4), LEX CHL(n=6), LEX GEN(n=1), LEX ORB(n=2), LEX TET(n=3), TET SXT(n=2)                                                                                                                                                                                                                                                                                                |
| 3 (n = 41)                   | AMC AMP LEX(n=1), AMP CHL TET(n=2), AMP DOX TET(n=2), AMP LEX CFZ(n=5), AMP LEX GEN(n=2), AMP LEX SXT(n=6), AMO LEX TET(n=6), AMP TET SXT(n=1), DOX TET SXT(n=1), ENO MAR ORB(n=1), GEN TET SXT(n=1), LEX CHL TET(n=1), LEX DOX TET(n=10), LEX GEN TET(n=1), LEX TET SXT(n=1)                                                                                                                                                                                          |
| 4 (n = 35)                   | AMC AMP LEX CFZ(n=1), AMP CHL DOX TET(n=1), AMP CHL GEN SXT(n=1), AMP CHL ORB SXT(n=1), AMP CHL TET SXT(n=1), AMP DOX TET SXT(n=2), AMO LEX CFZ CHL(n=1), AMP LEX CFZ GEN(n=1), AMP LEX CFZ SXT(n=2), AMP LEX CFZ TET(n=1), AMP LEX CHL TET(n=2), AMP LEX DOX TET(n=7), AMP LEX GEN TET(n=1), AMP LEX TET SXT(n=3), ENO MAR ORB PRA(n=4), LEX CFZ VEC CHL(n=1), LEX CHL DOX TET(n=3), LEX CHL TET SXT(n=1), LEX DOX TET SXT(n=1)                                       |
| 5 (n = 46)                   | AMC AMP LEX CFZ CPD(n=1), AMC AMP LEX CFZ PTZ(n=1), AMP CHL DOX ORB TET(n=1), AMP ENO MAR ORB PRA(n=4), AMP LEX CFZ DOX TET(n=2), AMP LEX CFZ VEC CPD(n=14), AMP LEX CHL DOX TET(n=2), AMP LEX CHL TET SXT(n=2), AMP LEX DOX TET SXT(n=2), AMP LEX GEN TET SXT(n=2), AMP LEX ORB TET SXT(n=1), CHL ENO MAR ORB PRA(n=1), LEX CHL DOX GEN TET(n=1), LEX CHL DOX TET SXT(n=1), LEX ENO MAR ORB PRA(n=11)                                                                 |
| 6 (n = 32)                   | AMC AMP LEX CFZ CHL PTZ(n=1), AMC AMP LEX CFZ VEC CPD(n=8), AMP CHL DOX GEN TET SXT(n=2), AMP LEX CFZ CHL TET SXT(n=1), AMP LEX CFZ DOX TET SXT(n=1), AMP LEX CFZ VEC CPD CAZ(n=4), AMP LEX CFZ VEC CPD GEN(n=1), AMP LEX CFZ VEC CPD TET(n=1), AMP LEX CHL DOX TET SXT(n=5), AMP LEX DOX GEN ORB TET(n=2), AMP LEX DOX GEN TET SXT(n=3), AMP LEX ENO MAR PRB PRA(n=2), DOX ENO MAR ORB PRA TET(n=1)                                                                   |
| 7 (n = 22)                   | AMC AMP LEX CFZ VEC CPD CAZ(n=6), AMC AMP LEX CFZ VEC CPD GEN(n=2), AMP CHL ENO GEN MAR ORB PRA(n=1), AMP CHL ENO MAR ORB PRA TET(n=1), AMP ENO GEN MAR ORB PRA SXT(n=2), AMP ENO GEN MAR ORB PRA TET(n=1), AMP LEX CFZ DOX GEN TET SXT(n=1), AMP LEX CFZ ENO MAR ORB PRA(n=1), AMO LEX CFZ VEC CPD CAZ COL(n=1), AMP LEX CFZ VEC CPD CAZ SXT(n=1), AMP LEX CFZ VEC CPD CAZ TET(n=2), AMP LEX ENO MAR ORB PRA SXT(n=2), LEX CHL ENO MAR ORB PRA TET(n=1)               |
| 8 (n = 14)                   | AMC AMP LEX CFZ VEC CPD CAZ SXT(n=2), AMC AMP LEX CFZ VEC CPD CAZ TET(n=1), AMC AMP LEX CFZ VEC CPD DOX TET(n=1), AMK AMP LEX CFZ DOX GEN TET SXT(n=1), AMP DOX ENO GEN MAR ORB PRA TET(n=1), AMP DOX ENO MAR ORB PRA TET SXT(n=1), AMP LEX CFZ VEC CPD CAZ CHL TET(n=1), AMP LEX CFZ VEC CPD CHL DOX TET(n=1), AMP LEX CFZ VEC CPD DOX TET SXT(n=1), AMP LEX CHL ENO MAR ORB PRA TET(n=2), AMP LEX ENO MAR ORB PRA TET SXT(n=1), LEX DOX ENO MAR ORB PRA TET SXT(n=1) |

|             |                                                                                                                                                                                                                                                                                                                                                                                                                                                                                                                                                                  |
|-------------|------------------------------------------------------------------------------------------------------------------------------------------------------------------------------------------------------------------------------------------------------------------------------------------------------------------------------------------------------------------------------------------------------------------------------------------------------------------------------------------------------------------------------------------------------------------|
| 9 (n = 23)  | AMC AMP CHL ENO MAR ORB PRA TET SXT(n=1), AMC AMP LEX CFZ VEC CPD CAZ PTZ SXT(n=1), AMP CHL DOX ENO MAR ORB PRA TET SXT(n=1), AMP CHL ENO GEN MAR ORB PRA TET SXT(n=1), AMP LEX CFZ ENO MAR ORB PRA TET SXT(n=2), AMP LEX CFZ VEC CPD CHL ENO MAR ORB(n=1), AMP LEX CFZ VEC CPD DOX GEN TET SXT(n=2), AMP LEX CFZ VEC CPD ENO MAR ORB PRA(n=5), AMP LEX CHL DOX ENO MAR ORB PRA TET(n=3), AMP LEX CHL ENO GEN MAR ORB PRA SXT(n=1), AMP LEX CHL ENO MAR ORB PRA TET SXT(n=1), AMP LEX DOX ENO MAR ORB PRA TET SXT(n=3), AMP LEX ENO GEN MAR ORB PRA TET SXT(n=1) |
| 10 (n = 11) | AMC AMP LEX CFZ CPD ENO GEN MAR ORB PRA(n=1), AMC AMP LEX CFZ VEC CPD CAZ CHL TET SXT(n=1), AMC AMP LEX CFZ VEC CPD CHL DOX TET SXT(n=1), AMP LEX CFZ CHL DOX ENO MAR ORB PRA TET(n=1), AMP LEX CFZ VEC CPD CAZ CHL DOX TET SXT(n=1), AMP LEX CFZ VEC CPD CHL ENO MAR ORB PRA(n=1), AMP LEX CFZ VEC CPD ENO GEN MAR ORB PRA(n=1), AMP LEX CFZ VEC CPD ENO MAR ORB PRA SXT(n=4)                                                                                                                                                                                   |
| 11 (n = 4)  | AMC AMP LEX CFZ VEC CPD CAZ ENO MAR ORB PRA (n=2), AMC AMP LEX CFZ VEC CPD CHL ENO MAR ORB PRA(n=1), AMK AMP LEX CFZ VEC CPD CHL DOX GEN TET SXT(n=1)                                                                                                                                                                                                                                                                                                                                                                                                            |
| 12 (n = 13) | AMC AMP LEX CFZ CPD DOX ENO GEN MAR ORB PRA TET(n=1), AMC AMP LEX CFZ VEC CPD CAZ DOX IPM PTZ TET SXT(n=1), AMC AMP LEX CFZ VEC CPD ENO GEN MAR ORB PRA SXT(n=1), AMP LEX CFZ VEC CPD CAZ CHL ENO MAR ORB PRA TET(n=1), AMP LEX CFZ VEC CPD CAZ DOX ENO GEN MAR ORB TET(n=1), AMP LEX CFZ VEC CPD CHL DOX ENO MAR ORB PRA TET(n=2), AMP LEX CFZ VEC CPD CHL ENO MAR ORB PRA TET SXT(n=2), AMP LEX CFZ VEC CPD DOX ENO MAR ORB PRA TET SXT(n=3), AMP LEX CFZ VEC CPD ENO GEN MAR ORB PRA TET SXT(n=1)                                                             |
| 13 (n = 5)  | AMK AMP LEX CFZ VEC CPD CHL ENO GEN MAR ORB PRA TET(n=1), AMP LEX CFZ VEC CPD CAZ ENO GEN MAR ORB PRA TET SXT(n=1), AMP LEX CFZ VEC CPD CHL DOX ENO MAR ORB PRA TET SXT(n=2), AMP LEX CFZ VEC CPD DOX ENO GEN MAR ORB PRA TET SXT(n=1)                                                                                                                                                                                                                                                                                                                           |
| 14 (n = 8)  | AMC AMP LEX CFZ VEC CPD CAZ CHL DOX ENO MAR ORB PRA TET(n=1), AMC AMP LEX CFZ VEC CPD CAZ ENO GEN MAR ORB PRA TET SXT(n=1), AMC AMP LEX CFZ VEC CPD DOX ENO GEN MAR ORB PRA TET SXT(n=2), AMP LEX CFZ VEC CPD CAZ CHL DOX ENO MAR ORV PRA TET SXT(n=3), AMP LEX CFZ VEC CPD CHL DOX ENO GEN MAR ORB PRA TET SXT(n=1)                                                                                                                                                                                                                                             |
| 15 (n = 8)  | AMC AMP LEX CFZ VEC CPD CAZ CHL DOX ENO MAR ORB PRA TET SXT(n=4), AMC AMP LEX CFZ VEC CPD CAZ DOX ENO GEN MAR ORB PRA TET SXT(n=2), AMC AMP LEX CFZ VEC CPD CHL DOX ENO GEN MAR ORB PRA TET SXT(n=1), AMP LEX CFZ VEC CPD CAZ CHL DOX ENO GEN MAR ORB PRA TET SXT(n=1)                                                                                                                                                                                                                                                                                           |

AMC, amoxicillin; AMK, amikacin/clavulanic acid; AMP, ampicillin; CAZ, ceftazidime; CFZ, cefazolin; CHL, chloramphenicol; COL, colistin; CPD, cefpodoxime; DOX, doxycycline; ENO, enrofloxacin; GEN, gentamicin; IPM, imipenem; LEX, cefalexin; MAR, marbofloxacin; ORB, orbifloxacin; PRA, paradofloxacin; PTZ, piperacillin/ tazobactam; SXT, trimethoprim/ sulphamethoxazole; TET, tetracycline; VEC, cefovecin.

Table S4. Antimicrobial resistance patterns of *Escherichia coli* isolated from cats (n = 206) during 2020–2022 in South Korea

| Antimicrobials<br>(isolates) | Resistance patterns (isolates)                                                                                                                             |
|------------------------------|------------------------------------------------------------------------------------------------------------------------------------------------------------|
| 0 (n = 87)                   | –                                                                                                                                                          |
| 1 (n = 61)                   | AMP(n=2), LEX(n=58), SXT(n=1)                                                                                                                              |
| 2 (n = 6)                    | AMP LEX(n=4), DOX TET(n=1), LEX SXT(n=1)                                                                                                                   |
| 3 (n = 12)                   | AMP CHL SXT(n=1), AMP CHL TET(n=1), AMP DOX TET(n=2), AMP LEX CFZ(n=3), AMP LEX ORB(n=1), AMP LEX TET(n=1) LEX CHL GEN(n=1), LEX DOX TET(n=2)              |
| 4 (n = 7)                    | AMP LEX CHL TET(n=1), AMP LEX DOX TET(n=4), AMP LEX GEN SXT(n=1), LEX CHL DOX TET(n=1)                                                                     |
| 5 (n = 8)                    | AMP CHL GEN TET SXT(n=1), AMP ENO MAR ORB PRA(n=1), AMP LEX CFZ DOX TET(n=1), AMP LEX CFZ VEC CPD(n=2), AMP LEX CHL DOX TET(n=2), LEX ENO MAR ORB PRA(n=1) |
| 6 (n = 6)                    | AMC AMP LEX CFZ VEC CPD(n=1), AMP LEX CFZ CHL DOX TET(n=3), AMP LEX CFZ VEC CPD CAZ(n=1), AMP LEX DOX GEN TET SXT(n=1)                                     |
| 7 (n = 6)                    | AMC AMP LEX CFZ VEC CPD CAZ(n=4), AMC AMP LEX CFZ VEC CPD CHL(n=1), AMP CHL ENO MAR ORB PRA TET(n=1)                                                       |
| 8 (n = 2)                    | AMC AMP LEX CFZ VEC CPD DOX TET(n=1), AMP LEX CFZ VEC CPD GEN TET SXT(n=1)                                                                                 |
| 9 (n = 3)                    | AMP CFZ CHL ENO MAR ORB PRA TET SXT(n=1), AMP LEX CFZ VEC CPD ENO MAR ORB PRA(n=2)                                                                         |
| 10 (n = 2)                   | AMP LEX CFZ VEC CPD CAZ DOX ORB TET SXT(n=1), AMP LEX DOX ENO GEN MAR ORB PRA TET SXT(n=1)                                                                 |
| 11 (n = 2)                   | AMP LEX CFZ VEC CPD CAZ ENO GEN MAR ORB PRA (n=1), AMP LEX CFZ VEC CPD DOX ENO MAR ORB PRA TET (n=1)                                                       |
| 12 (n = 1)                   | AMP LEX CFZ VEC CPD CHL DOX ENO MAR ORB PRA TET (n=1)                                                                                                      |
| 13 (n = 0)                   | –                                                                                                                                                          |
| 14 (n = 3)                   | AMC AMP LEX CFZ VEC CPD CAZ CHL ENO MAR PRB PRA TET SXT(n=1), AMP LEX CFZ VEC CPD CAZ DOX ENO GEN MAR ORB PRA TET SXT(n=2)                                 |

AMC, amoxicillin; AMP, ampicillin; CAZ, ceftazidime; CFZ, cefazolin; CHL, chloramphenicol; CPD, cefpodoxime, DOX, doxycycline; ENO, enrofloxacin; GEN, gentamicin; LEX, cefalexin; MAR, marbofloxacin; ORB, orbifloxacin; PRA, paradofloxacin; SXT, trimethoprim/ sulphamethoxazole; TET, tetracycline; VEC, cefovecin.
